# Supplementary material for: The Transcription Factor ATF4 Promotes Expression of Cell Stress Genes and Cardiomyocyte Death in a Cellular Model of Atrial Fibrillation
Source: Biomed Res Int. 2018 May 29;2018:3694362. doi: 10.1155/2018/3694362 (PMC5996409; doi:10.1155/2018/3694362)
Supplement: Supplementary Materials — Suppl. Figure S1: ATF4 expression in tunicamycin treated cardiomyocytes. Representative western blots showing protein expression of ATF4 in response to tunicamycin (0, 2, and 4 µg/ml) treatment. Suppl. Figure S2: original western blots. (A, B) Blots from Figure 2(a). (C, D) Blots from Figure 1(b). (E, F) Blots from Figure 1(c). (G, H) Blots from Figure 1(d). (I, J) Blots from Figure 6(a) (K, L). [file 3694362.f1.zip]

Archive with 2 entries (2 files):
- 3694362.f1.ai
- 3694362.f2.ai
